# Supplementary material
Source: Royal Society of Chemistry journal article supplement (doi:10.1039/d6ta01507g)
Supplement: d6ta01507g1.pdf [file d6ta01507g1.pdf]

Electronic Supplementary Information

**PdNi nanosheets with coordinated d-d orbitals for efficient ethanol electrooxidation via the C<sub>2</sub> pathway**

Guanjun Chen<sup>a,\*</sup>, Zheming Huang<sup>a</sup>, Yichu Lei<sup>a</sup>, Kaiwen Yang<sup>a</sup>, Jiayi Yang<sup>a</sup>, Long Chen<sup>a</sup>,  
Tong Wang<sup>a</sup>, Shuhan Yang<sup>b,\*</sup>, Haibo Yang<sup>a,\*</sup>

<sup>a</sup> *School of Materials Science and Engineering, Shaanxi University of Science and Technology, Xi'an, 710021, China*

<sup>b</sup> *State Key Laboratory for Mechanical Behavior of Materials, Xi'an Jiaotong University, Xi'an, 710049, China*

\*Corresponding author:

sk-cgj@sust.edu.cn (G. J. Chen);

2746341535@stu.xjtu.edu.cn (S. H. Yang);

yanghaibo@sust.edu.cn (H. B. Yang).

Figure S1 Guanjun Chen *et al.*

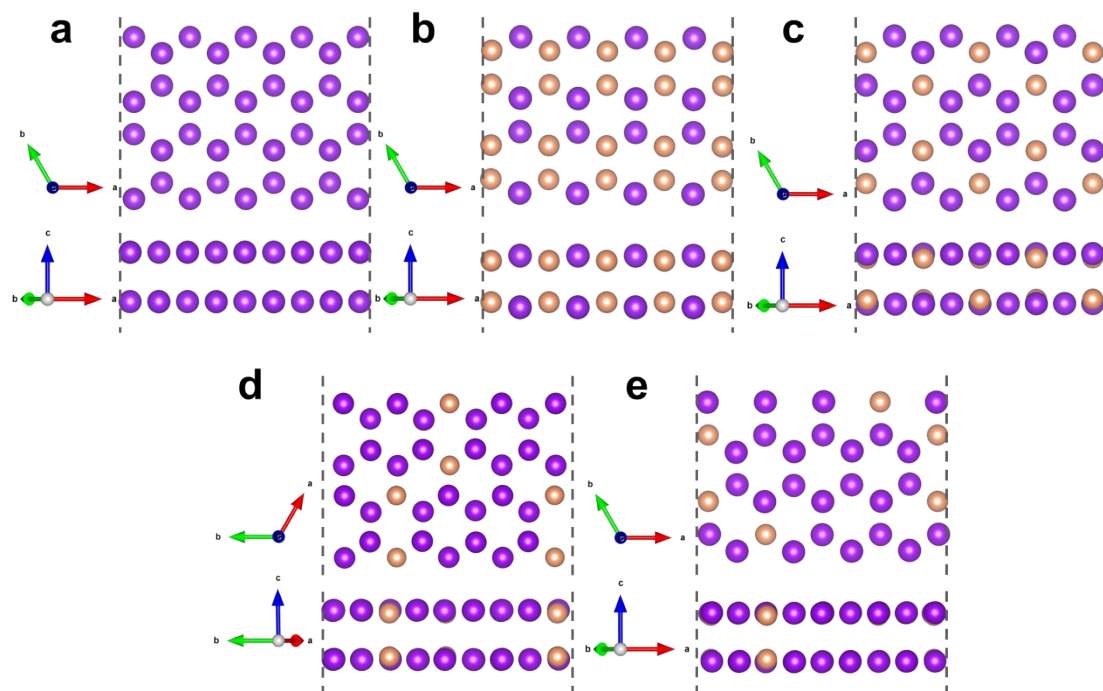

**Figure S1.** The optimized stable structure model of (a) Pd, (b)  $\text{Pd}_1\text{Ni}_1$ , (c)  $\text{Pd}_3\text{Ni}_1$ , (d)  $\text{Pd}_5\text{Ni}_1$  and (e)  $\text{Pd}_7\text{Ni}_1$ .

Figure S2 Guanjun Chen *et al.*

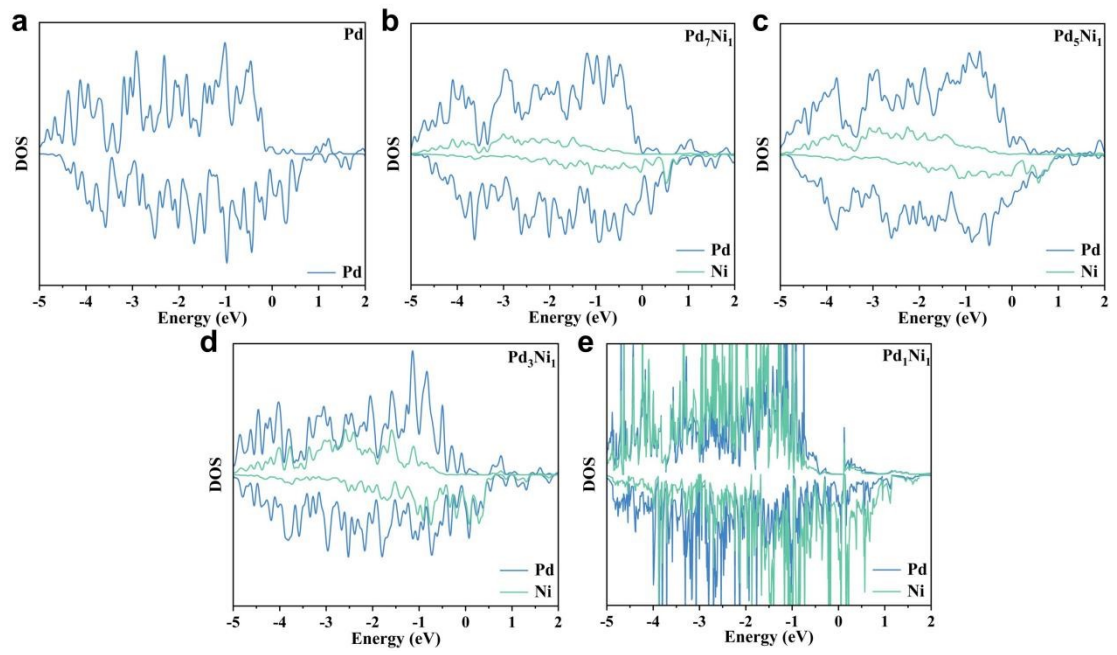

Figure S2. (a) DOS of Pd. (b-e) DOS of Pd and Ni in Pd<sub>x</sub>Ni<sub>y</sub>.

Figure S3 Guanjun Chen *et al.*

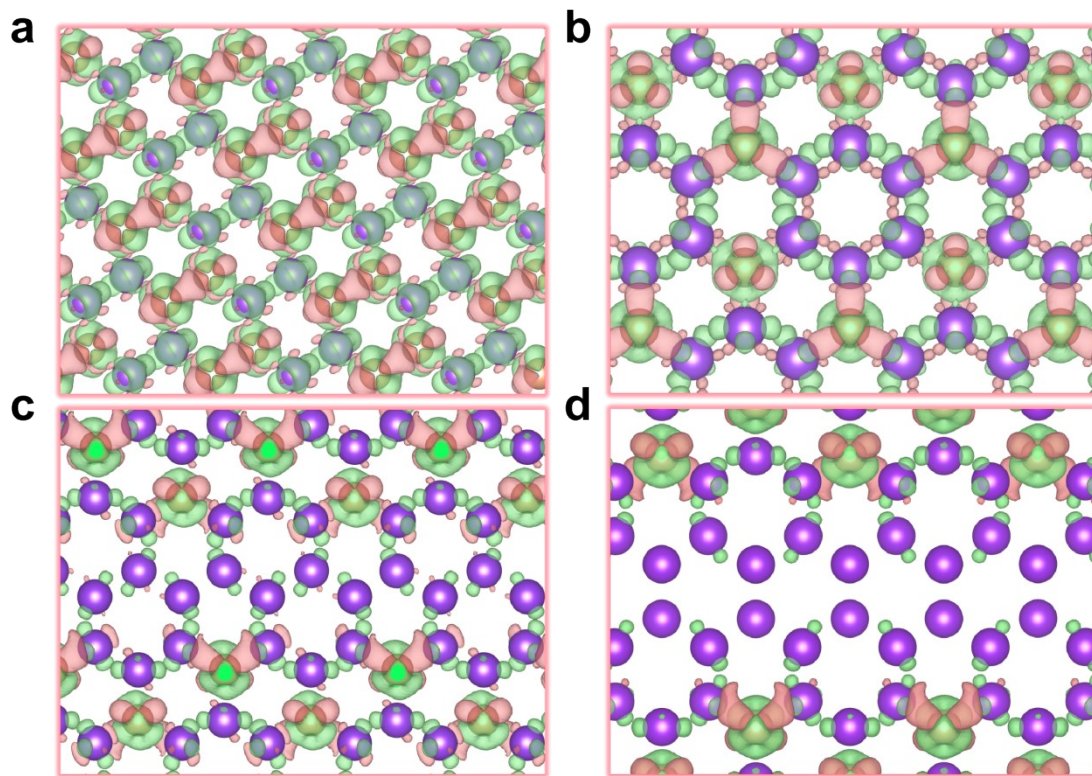

**Figure S3.** The differential charge distributions of (a) Pd<sub>1</sub>Ni<sub>1</sub>, (b) Pd<sub>3</sub>Ni<sub>1</sub>, (c) Pd<sub>5</sub>Ni<sub>1</sub> and (d) Pd<sub>7</sub>Ni<sub>1</sub>. The corresponding isosurface value are set to  $8 \times 10^{-3} e/\text{\AA}^3$ . Pd and Ni atoms are represented by purple and orange balls.

**Figure S4** Guanjun Chen *et al.*

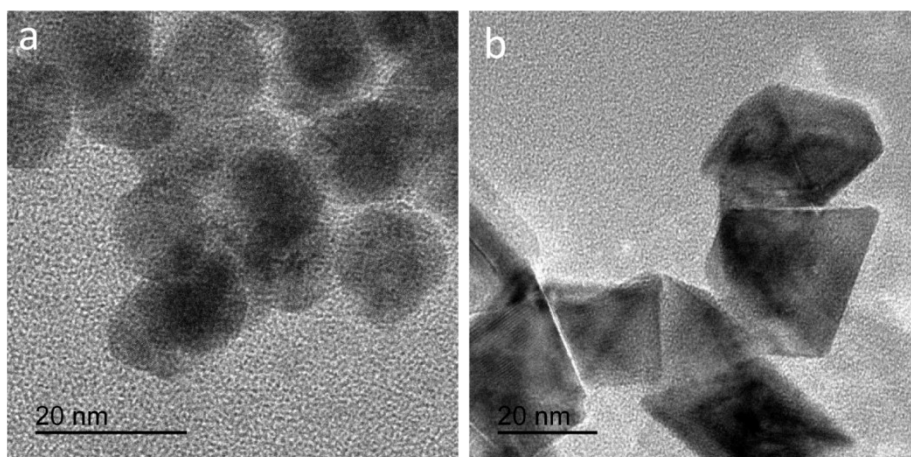

**Figure S4.** (a) Product obtained in the absence of  $\text{Mo(CO)}_6$ ; (b) product obtained in the absence of CTAB.

Figure S5 Guanjun Chen *et al.*

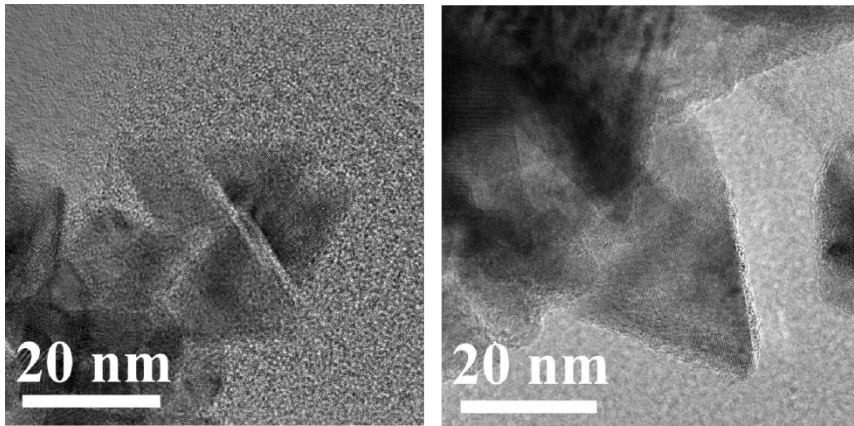

Figure S5. TEM images of Pd<sub>x</sub>Ni<sub>y</sub>.

Figure S6 Guanjun Chen *et al.*

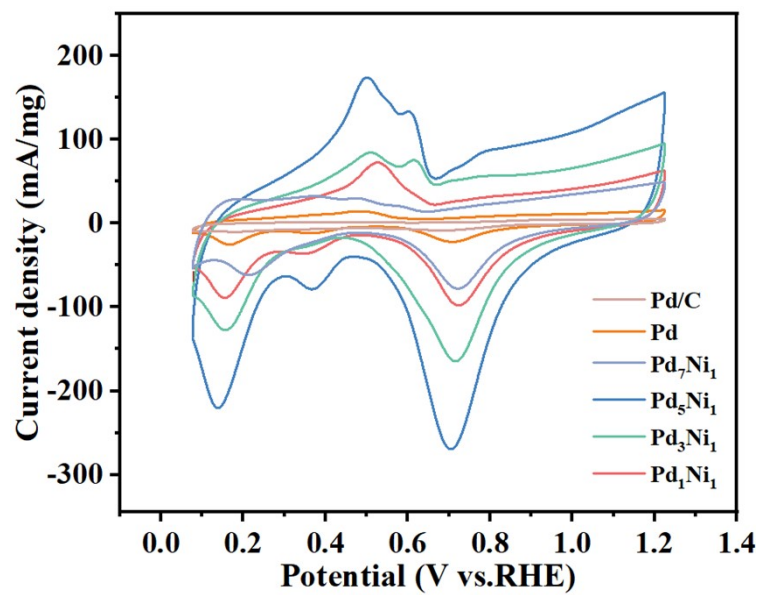

Figure S6. Stable CV curves of commercial Pd/C, Pd nanosheet and Pd<sub>x</sub>Ni<sub>y</sub> nanosheets in 1 M KOH.

Figure S7 Guanjun Chen *et al.*

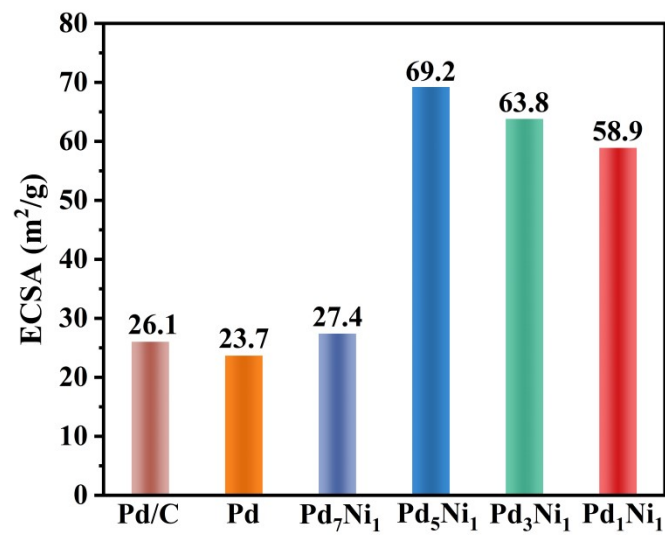

Figure S7. The ECSA values of commercial Pd/C, pure Pd nanosheet, Pd<sub>7</sub>Ni<sub>1</sub>, Pd<sub>5</sub>Ni<sub>1</sub>, Pd<sub>3</sub>Ni<sub>1</sub> and Pd<sub>1</sub>Ni<sub>1</sub> catalysts.

Figure S8 Guanjun Chen *et al.*

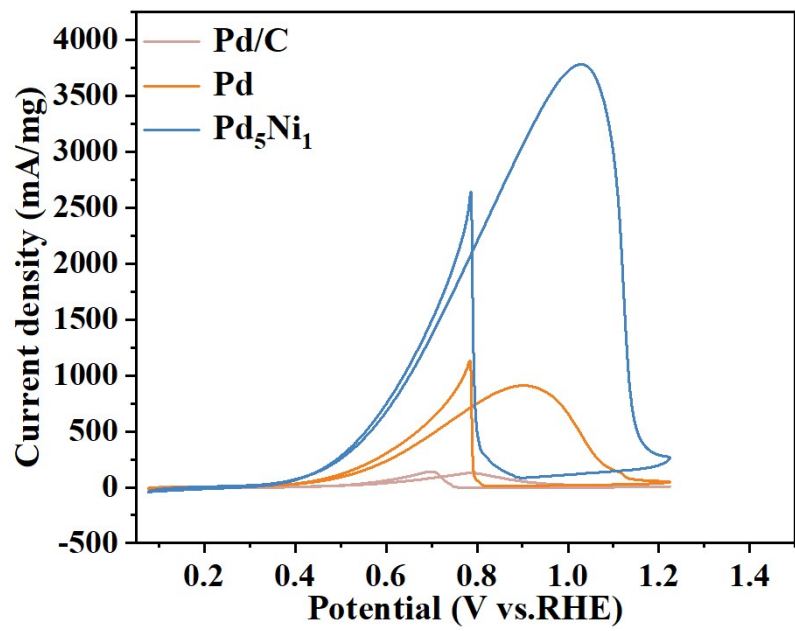

Figure S8. Stable CV curves of commercial Pd/C, Pd nanosheet and Pd<sub>5</sub>Ni<sub>1</sub> nanosheet in 1 M KOH/1

M

ethanol.

Figure S9 Guanjun Chen *et al.*

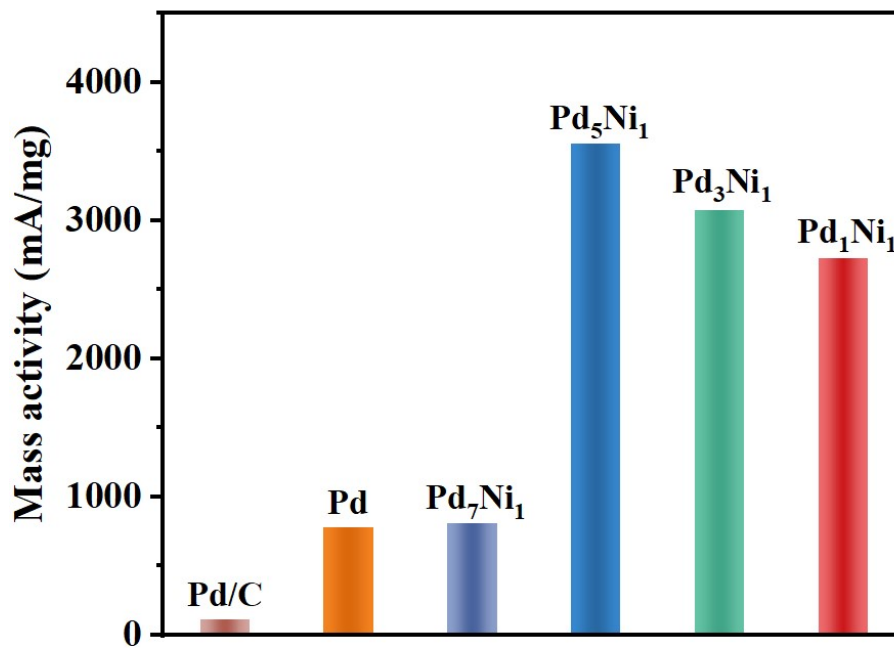

Figure S9. The maximum mass activities of commercial Pd/C, Pd nanosheet and Pd<sub>x</sub>Ni<sub>y</sub> nanosheets.

Figure S10 Guanjun Chen *et al.*

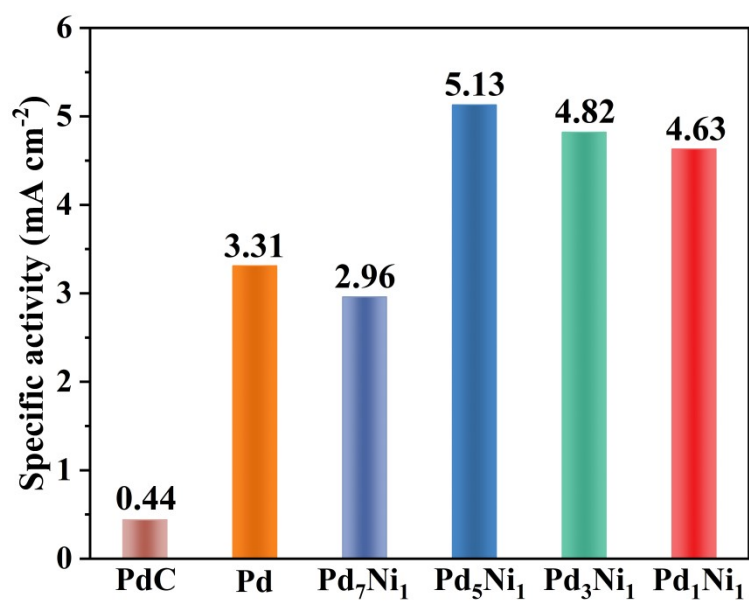

**Figure S10.** The specific activities of commercial Pd/C, pure Pd nanosheet, Pd<sub>7</sub>Ni<sub>1</sub>, Pd<sub>5</sub>Ni<sub>1</sub>, Pd<sub>3</sub>Ni<sub>1</sub> and Pd<sub>1</sub>Ni<sub>1</sub> catalysts.

Figure S11 Guanjun Chen *et al.*

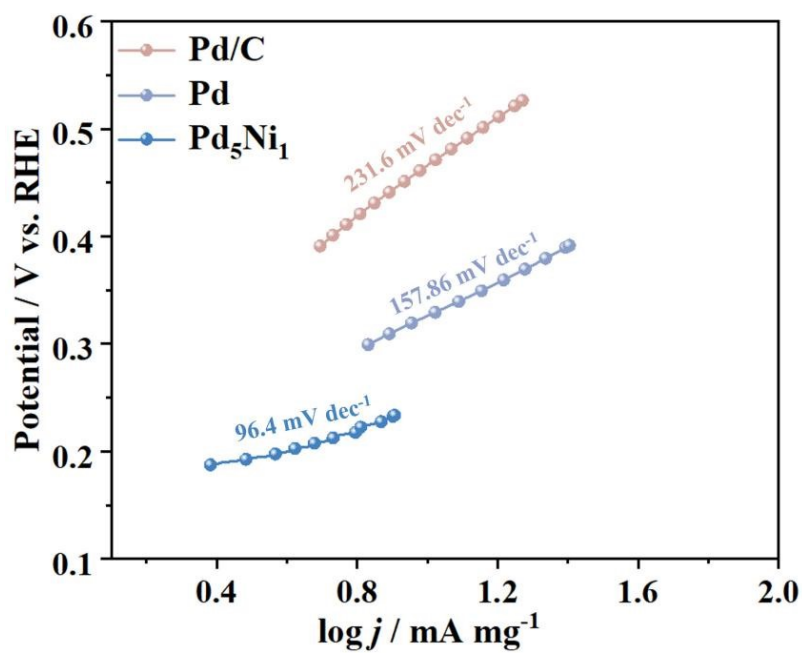

Figure S11. The Tafel slope of Pd/C, pure Pd and Pd<sub>5</sub>Ni<sub>1</sub> catalysts.

Figure S12 Guanjun Chen *et al.*

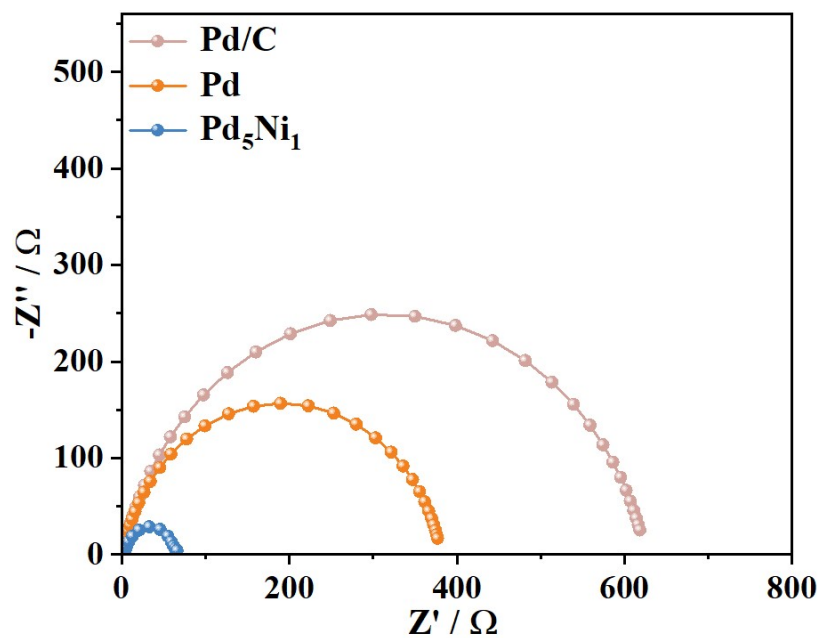

Figure S12. The EIS spectra of Pd/C, pure Pd and Pd<sub>5</sub>Ni<sub>1</sub> catalysts.

Figure S13 Guanjun Chen *et al.*

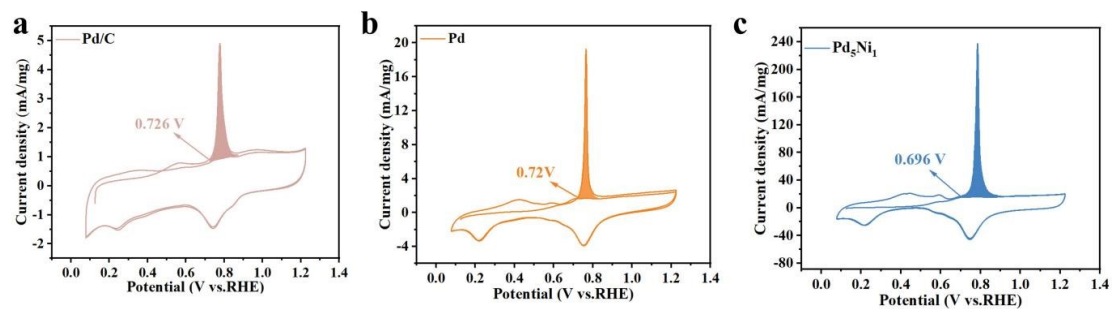

Figure S13. The CO stripping curves of Pd/C, pure Pd and Pd<sub>5</sub>Ni<sub>1</sub> catalysts.

Figure S14 Guanjun Chen *et al.*

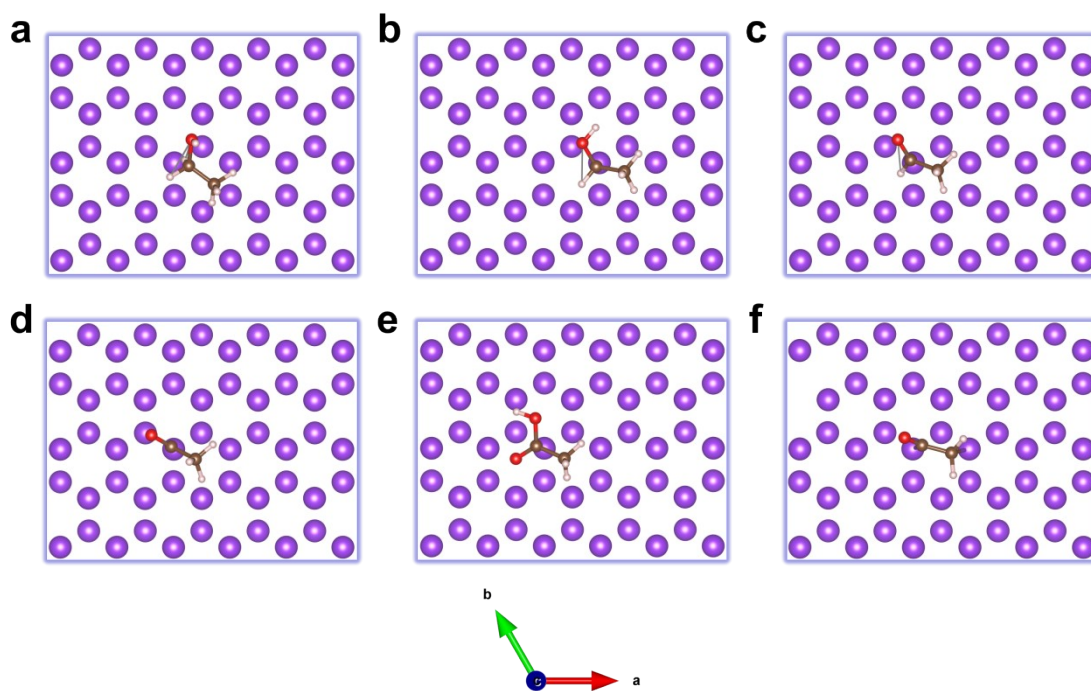

Figure S14. The stable models of (a)  $^*\text{CH}_3\text{CH}_2\text{OH}$ , (b)  $^*\text{CH}_3\text{CHOH}$ , (c)  $^*\text{CH}_3\text{CHO}$ , (d)  $^*\text{CH}_3\text{CO}$ , (e)  $^*\text{CH}_3\text{CHOOH}$  and (f)  $^*\text{CH}_2\text{CO}$  adsorption in Pd surface.

Figure S15 Guanjun Chen *et al.*

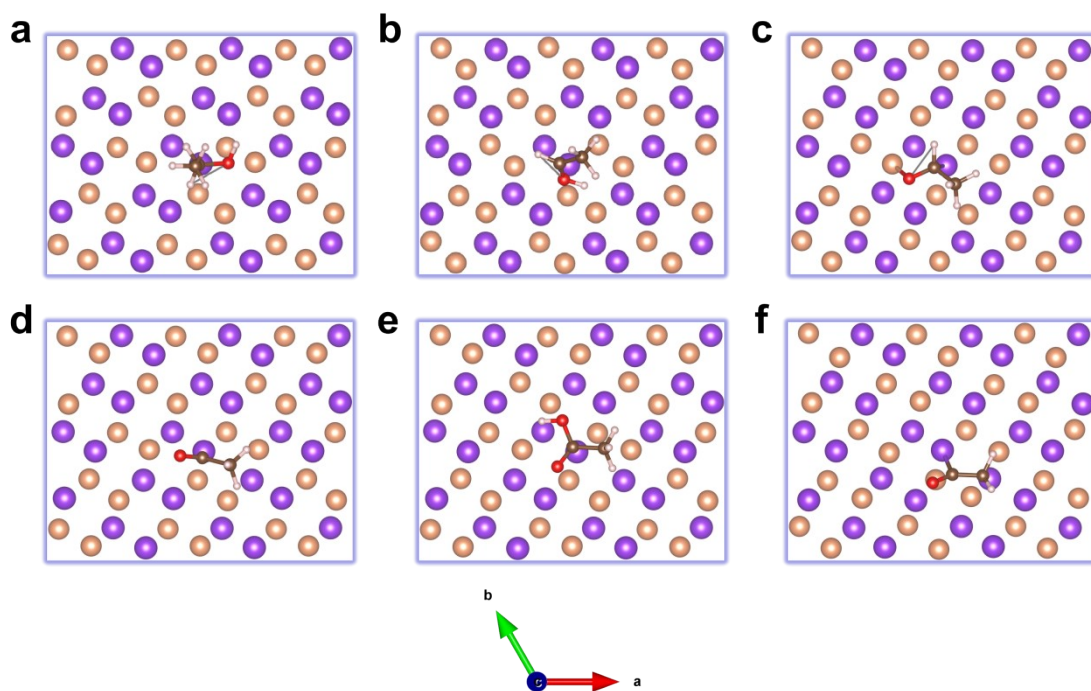

Figure S15. The stable models of (a)  $^*\text{CH}_3\text{CH}_2\text{OH}$ , (b)  $^*\text{CH}_3\text{CHOH}$ , (c)  $^*\text{CH}_3\text{CHO}$ , (d)  $^*\text{CH}_3\text{CO}$ , (e)  $^*\text{CH}_3\text{CHOOH}$  and (f)  $^*\text{CH}_2\text{CO}$  adsorption in Pd<sub>1</sub>Ni<sub>1</sub> surface.

Figure S16 Guanjun Chen *et al.*

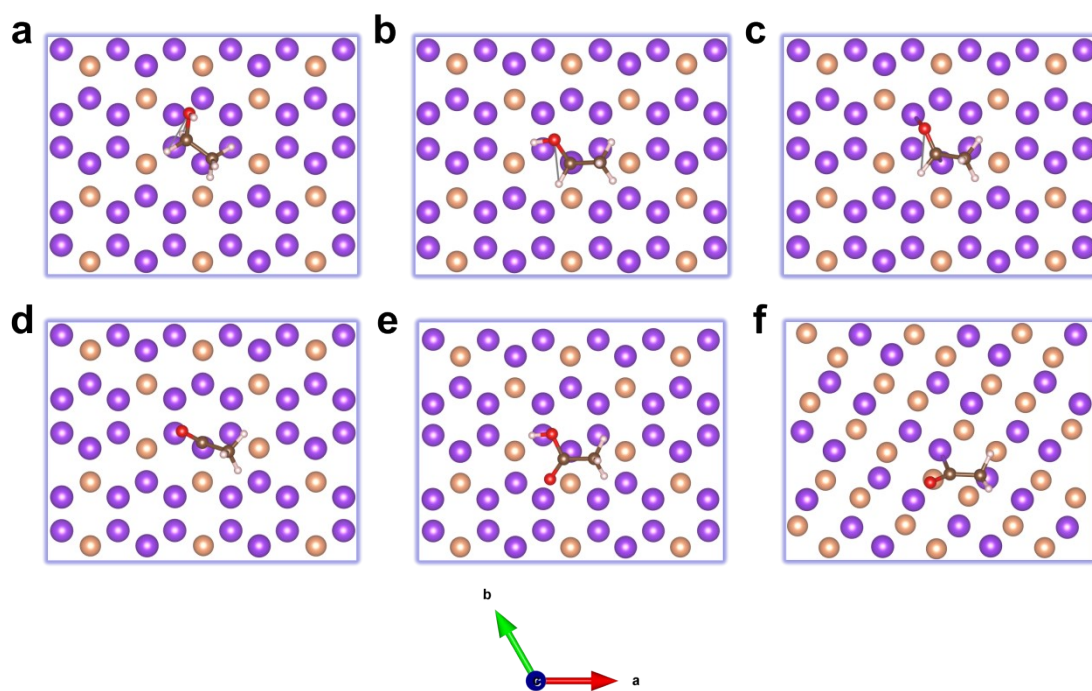

Figure S16. The stable models of (a)  $^*\text{CH}_3\text{CH}_2\text{OH}$ , (b)  $^*\text{CH}_3\text{CHOH}$ , (c)  $^*\text{CH}_3\text{CHO}$ , (d)  $^*\text{CH}_3\text{CO}$ , (e)  $^*\text{CH}_3\text{CHOOH}$  and (f)  $^*\text{CH}_2\text{CO}$  adsorption in Pd<sub>3</sub>Ni<sub>1</sub> surface.

Figure S17 Guanjun Chen *et al.*

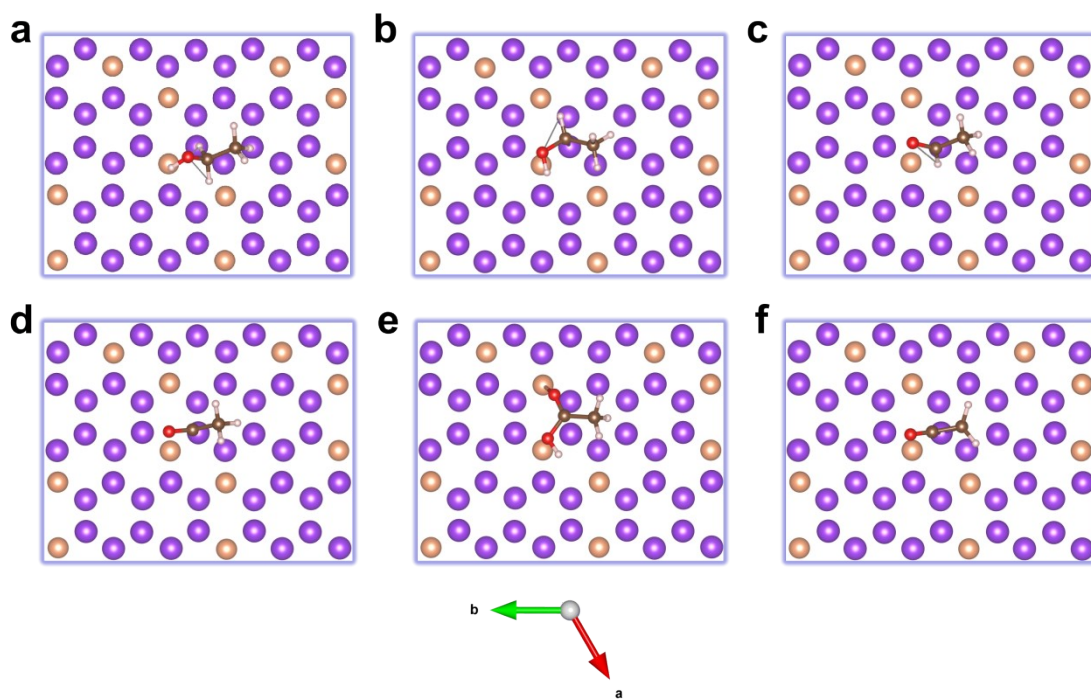

Figure S17. The stable models of (a) \*CH<sub>3</sub>CH<sub>2</sub>OH, (b) \*CH<sub>3</sub>CHOH, (c) \*CH<sub>3</sub>CHO, (d) \*CH<sub>3</sub>CO, (e) \*CH<sub>3</sub>CHOOH and (f) \*CH<sub>2</sub>CO adsorption in Pd<sub>5</sub>Ni<sub>1</sub> surface.

Figure S18 Guanjun Chen *et al.*

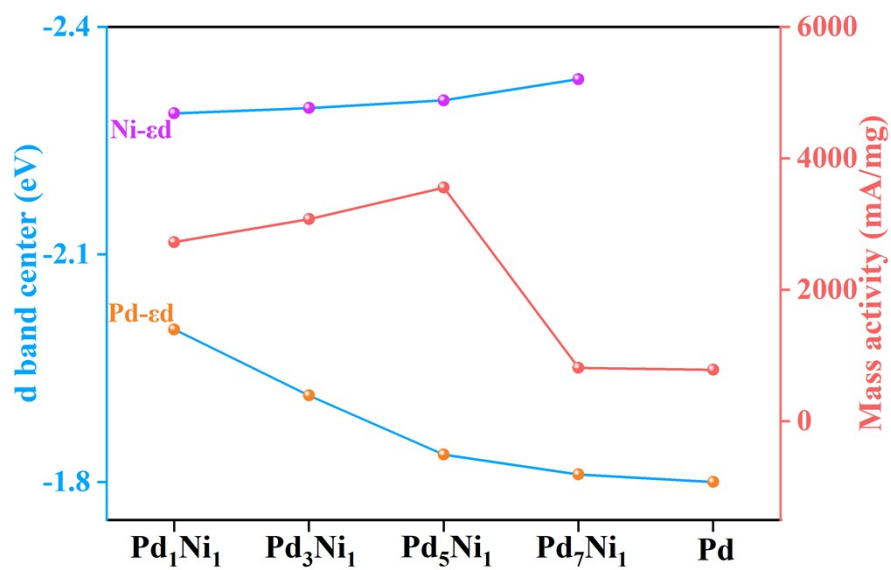

Figure S18. The the d-band centers of Pd and Ni, as well as mass activities vs. composition for the Pd<sub>x</sub>Ni<sub>y</sub>.

Figure S19 Guanjun Chen *et al.*

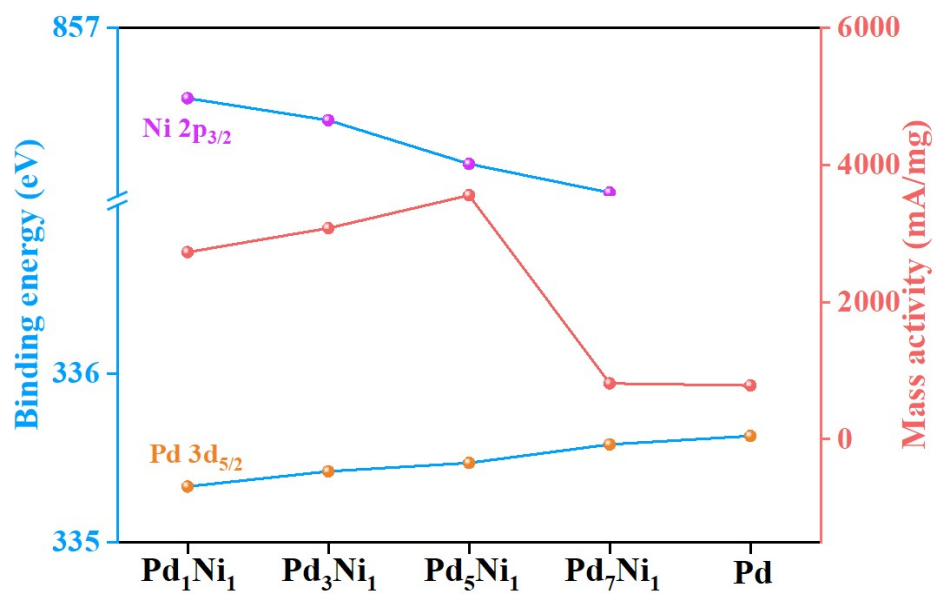

Figure S19. The binding energies and mass activities vs. composition for the Pd<sub>x</sub>Ni<sub>y</sub>.

**Table S1** Guanjun Chen *et al.*

**Table S1** The calculated Pd-Pd bond length in pure Pd and Pd-Ni bond lengths in Pd<sub>x</sub>Ni<sub>y</sub> alloy.

| Sample                          | Pd-Pd bond length (Å) | Pd-Ni bond length (Å) |
|---------------------------------|-----------------------|-----------------------|
| Pd <sub>1</sub> Ni <sub>1</sub> | --                    | 2.589                 |
| Pd <sub>3</sub> Ni <sub>1</sub> | --                    | 2.656                 |
| Pd <sub>5</sub> Ni <sub>1</sub> | --                    | 2.685                 |
| Pd <sub>7</sub> Ni <sub>1</sub> | --                    | 2.691                 |
| Pure Pd                         | 2.714                 | --                    |

**Table S2** Guanjun Chen *et al.*

**Table S2** The calculated Bader charge of surface Pd and Ni atoms for Pd<sub>x</sub>Ni<sub>y</sub> alloy.

| Sample                          | Bader charge (e) |        |
|---------------------------------|------------------|--------|
|                                 | Pd               | Ni     |
| Pd <sub>1</sub> Ni <sub>1</sub> | 0.234            | -0.235 |
| Pd <sub>3</sub> Ni <sub>1</sub> | 0.101            | -0.297 |
| Pd <sub>5</sub> Ni <sub>1</sub> | 0.074            | -0.335 |
| Pd <sub>7</sub> Ni <sub>1</sub> | 0.04             | -0.340 |

**Table S3** Guanjun Chen *et al.*

**Table S3** The calculated d band center ( $\epsilon_d$ ) of surface Pd and Ni atoms for pure Pd and Pd<sub>x</sub>Ni<sub>y</sub> alloy.

| Sample                          | $\epsilon_d$ (eV) |        |
|---------------------------------|-------------------|--------|
|                                 | Pd                | Ni     |
| Pd <sub>1</sub> Ni <sub>1</sub> | -2.001            | -2.286 |
| Pd <sub>3</sub> Ni <sub>1</sub> | -1.194            | -2.293 |
| Pd <sub>5</sub> Ni <sub>1</sub> | -1.836            | -2.303 |
| Pd <sub>7</sub> Ni <sub>1</sub> | -1.810            | -2.331 |
| Pure Pd                         | -1.800            | --     |

**Table S4** Guanjun Chen *et al.*

**Table S4** A summary of lattice parameters of Pd nanosheets and Pd<sub>x</sub>Ni<sub>y</sub> nanosheets.

| Sample                                    | 2θ/degree<br>(111) | Crystalline size<br>nm | Interplanar spacing<br>nm | Strain<br>% |
|-------------------------------------------|--------------------|------------------------|---------------------------|-------------|
| Pd <sub>x</sub> Ni <sub>y</sub> nanosheet | 40.20              | 8.76                   | 0.2241                    | 0.71        |
| Pd nanosheets                             | 39.85              | 9.38                   | 0.2257                    | -           |

**Table S5** Guanjun Chen *et al.*

**Table S5** The chemical states of Pd and Ni in Pd<sub>x</sub>Ni<sub>y</sub> alloy.

|                  | Pd   | Pd <sub>7</sub> Ni <sub>1</sub> | Pd <sub>5</sub> Ni <sub>1</sub> | Pd <sub>3</sub> Ni <sub>1</sub> | Pd <sub>1</sub> Ni <sub>1</sub> |
|------------------|------|---------------------------------|---------------------------------|---------------------------------|---------------------------------|
| Pd <sup>0</sup>  | 72.6 | 70.2                            | 74.6                            | 72.9                            | 73.9                            |
| Pd <sup>2+</sup> | 27.4 | 29.8                            | 25.4                            | 27.1                            | 26.1                            |
| Ni <sup>0</sup>  | -    | 69.9                            | 72.3                            | 73.7                            | 75.2                            |
| Ni <sup>2+</sup> | -    | 30.1                            | 27.7                            | 26.3                            | 24.8                            |

**Table S6** Guanjun Chen *et al.*

**Table S6** The intermediate free energy of the EOR on the surface of pure Pd and Pd<sub>x</sub>Ni<sub>y</sub> alloy.

| Intermediate                        | Pd <sub>1</sub> Ni <sub>1</sub> | Pd <sub>3</sub> Ni <sub>1</sub> | Pd <sub>5</sub> Ni <sub>1</sub> | Pure Pd |
|-------------------------------------|---------------------------------|---------------------------------|---------------------------------|---------|
| *CH <sub>3</sub> CH <sub>2</sub> OH | -0.77762                        | -1.05768                        | 0.38628                         | 0.03935 |
| *CH <sub>3</sub> CHOH               | -0.10713                        | -0.77542                        | 0.75613                         | 0.39442 |
| *CH <sub>3</sub> CHO                | 0.07458                         | -0.25025                        | 1.20051                         | 1.08950 |
| *CH <sub>3</sub> CO                 | 0.28660                         | 0.22291                         | 0.90844                         | 0.72800 |
| *CH <sub>3</sub> CHOOH              | 0.11194                         | -0.31166                        | 0.87468                         | 0.82667 |
| *CH <sub>2</sub> CO                 | 1.08546                         | 0.36258                         | 1.87765                         | 1.43243 |
